# Supplementary material for: A Meta-Analysis of Obesity and Risk of Colorectal Cancer in Patients with Lynch Syndrome: The Impact of Sex and Genetics
Source: MDPI journal article supplement (doi:10.3390/nu13051736), 2021-05-20
Supplement: s1 [file s1]

**Supplementary Table . Quality assessment of studies using a modified Newcastle-Ottawa scale**

**Table S1. Quality assessment of studies using a modified Newcastle-Ottawa scale-COHORT STUDIES**

| Quality assessment criteria                                               | Accetable (*)                                                                | Botma et al. | Movahedi et al. | Win et al. |
|---------------------------------------------------------------------------|------------------------------------------------------------------------------|--------------|-----------------|------------|
| <i>Selection</i>                                                          |                                                                              |              |                 |            |
| Representativeness of exposed cohort?                                     | Cancer registries/Amsterdam diagnostic criteria                              | *            | *               | *          |
| Selection of the non-exposed cohort?                                      | Same setting as exposed cohort                                               | *            | *               | *          |
| Ascertainment of exposure?                                                | Measured BMI                                                                 |              |                 |            |
| Demonstration that outcome of interest was not present at start of study? | Information about previously colonoscopies and adenomatous polyp occurrences | *            | *               | *          |
| <i>Comparability</i>                                                      |                                                                              |              |                 |            |
| Stratification for possible modifier of risk                              | Study stratify for sex                                                       | *            | *               |            |
| Study controls for at least 3 additional risk factors?                    | Adjusted for age, smoking habits, alcohol intake, aspirin and/or genes       | *            | *               | *          |
| <i>Outcome</i>                                                            |                                                                              |              |                 |            |
| Assessment of outcome?                                                    | Secure record or directly measured of colorectal cancer histology            |              | *               | *          |
| Was follow-up long enough for outcome to occur?                           |                                                                              | *            | *               | *          |
| <b>Total Score</b>                                                        |                                                                              | 6            | 7               | 6          |

BMI: Body Mass Index

Each star (\*) denotes a fulfilled quality assessment criteria

**Table S2. Quality assessment of studies using a modified Newcastle-Ottawa scale-CASE-CONTROL STUDY**

| Quality assessment criteria                  | Accetable (*)                                                          | Campbell et al. |
|----------------------------------------------|------------------------------------------------------------------------|-----------------|
| <i>Selection</i>                             |                                                                        |                 |
| Is the case definition adequate?             | Pathology-confirmed International Classification of colorectal cancer  | *               |
| Representativeness of cases?                 | Cancer registries/Amsterdam diagnostic criteria                        | *               |
| Selection of controls?                       | Same setting as exposed cohort                                         |                 |
| Definition of controls?                      | No evidence of disease                                                 |                 |
| <i>Comparability</i>                         |                                                                        |                 |
| Stratification for possible modifier of risk | Study stratify for sex                                                 | *               |
| Study controls for at least 3 additional     | Adjusted for age, smoking habits, alcohol intake, aspirin and/or genes |                 |

**Supplementary Table . Quality assessment of studies using a modified Newcastle-Ottawa scale**

|                                                 |              |   |
|-------------------------------------------------|--------------|---|
| risk factors?                                   |              |   |
| <i>Outcome</i>                                  |              |   |
| Ascertainment of exposure?                      | Measured BMI |   |
| Same method of ascertainment of cases/controls? |              | * |
| Non-response rate?                              |              | * |
| <b>Total score</b>                              |              | 5 |

*Each star (\*) denotes a fulfilled quality assessment criteria*
